# Supplementary material
Source: publisher site journal article supplement (https://www.spandidos-publications.com/1041/downloadSupplementary)

Figure S1. (A) miR-25-3p was validated as a direct target of LINC00858 using RIP assay. (B) The expression level of miR-25-3p was assessed after transfection with miR-NC or miR-25-3p mimics using reverse transcription-quantitative PCR. (C) The expression level of miR-25-3p was measured after transfection with NC or miR-25-3p inhibitor using reverse transcription-quantitative PCR. Data are presented as the mean  $\pm$  SEM;  $n \geq 3$ . \*\* $P < 0.01$ . miR, microRNA; RIP, RNA-binding protein immunoprecipitation.

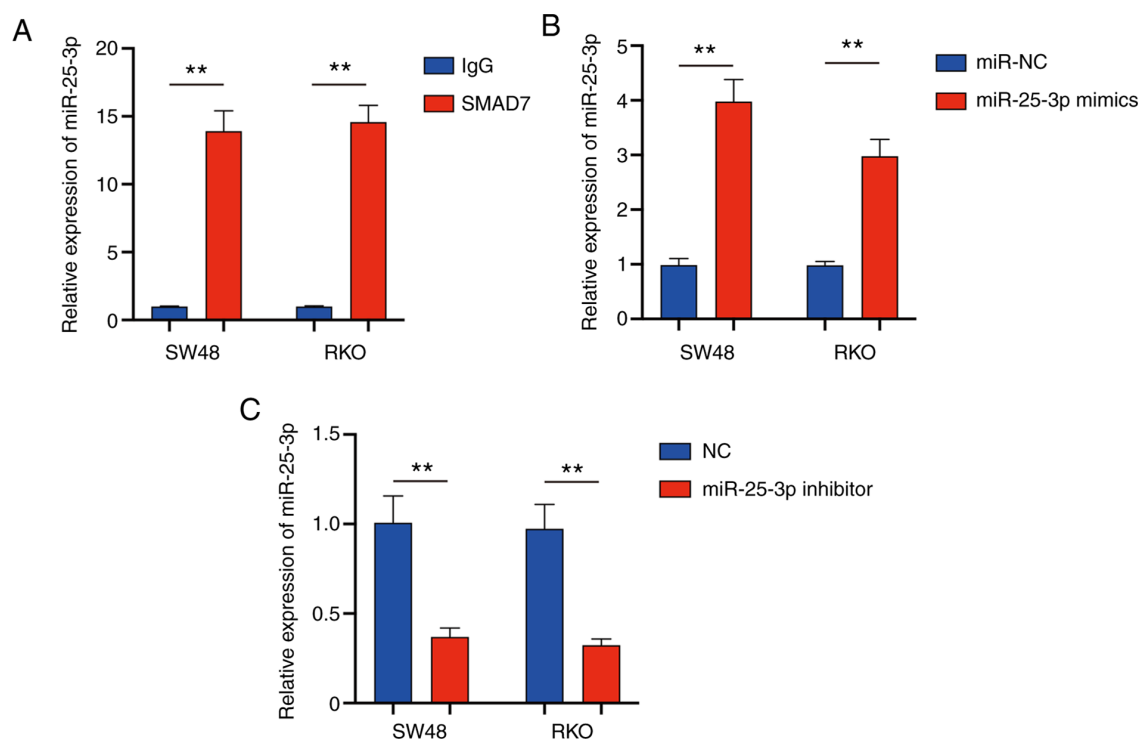

Supplement: Supplementary file 1 [file downloadSupplementary]
